# Supplementary material
Source: MDPI journal article supplement (https://www.mdpi.com/1999-4907/10/3/203)

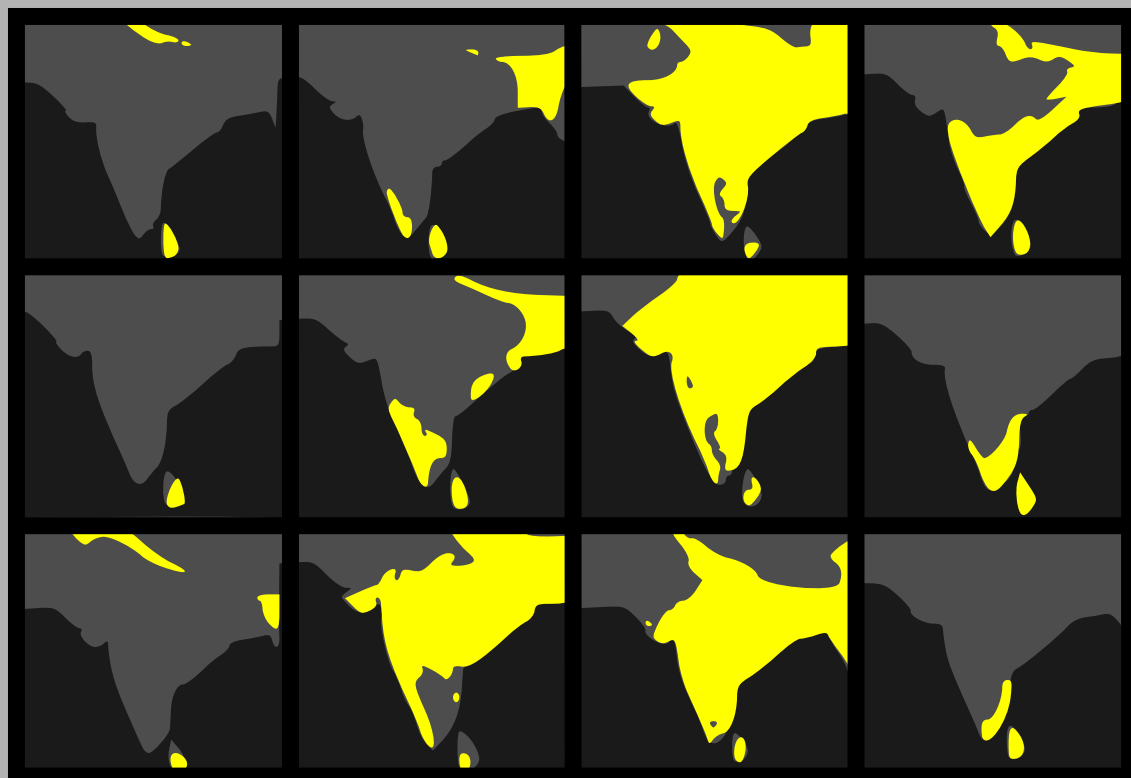

(a)

P

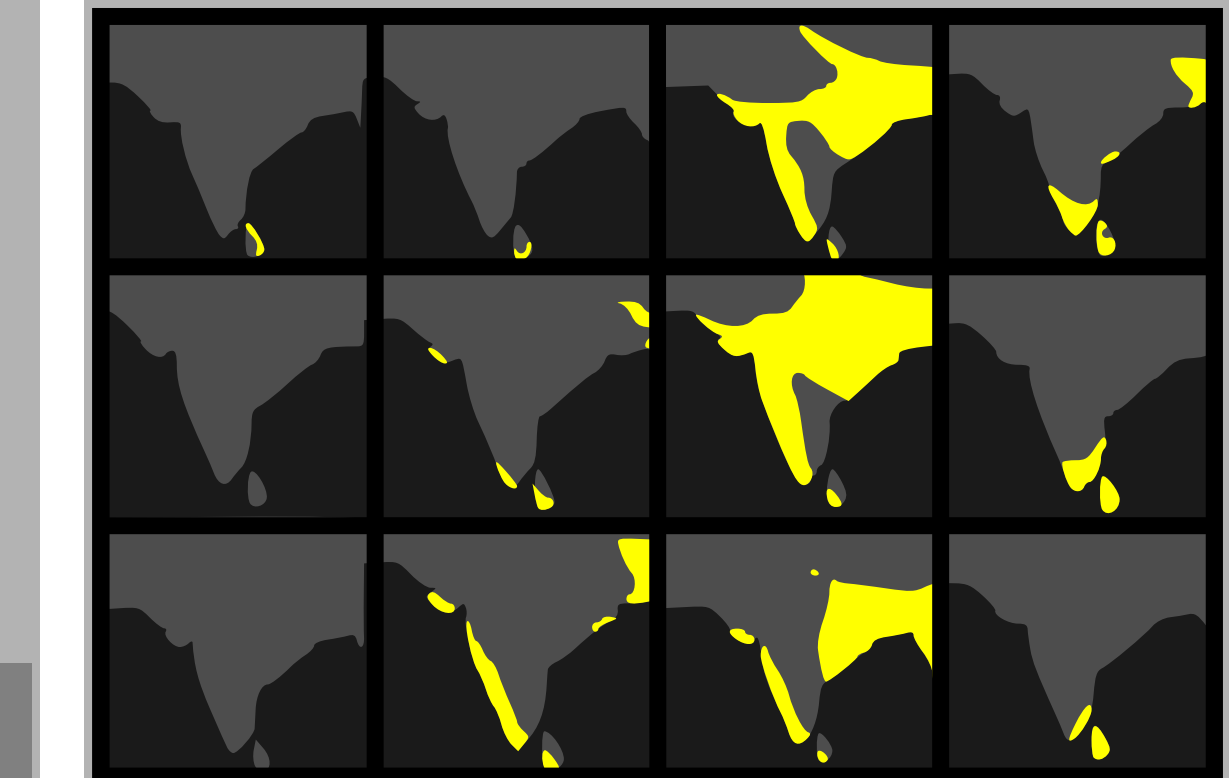

(b)

RH

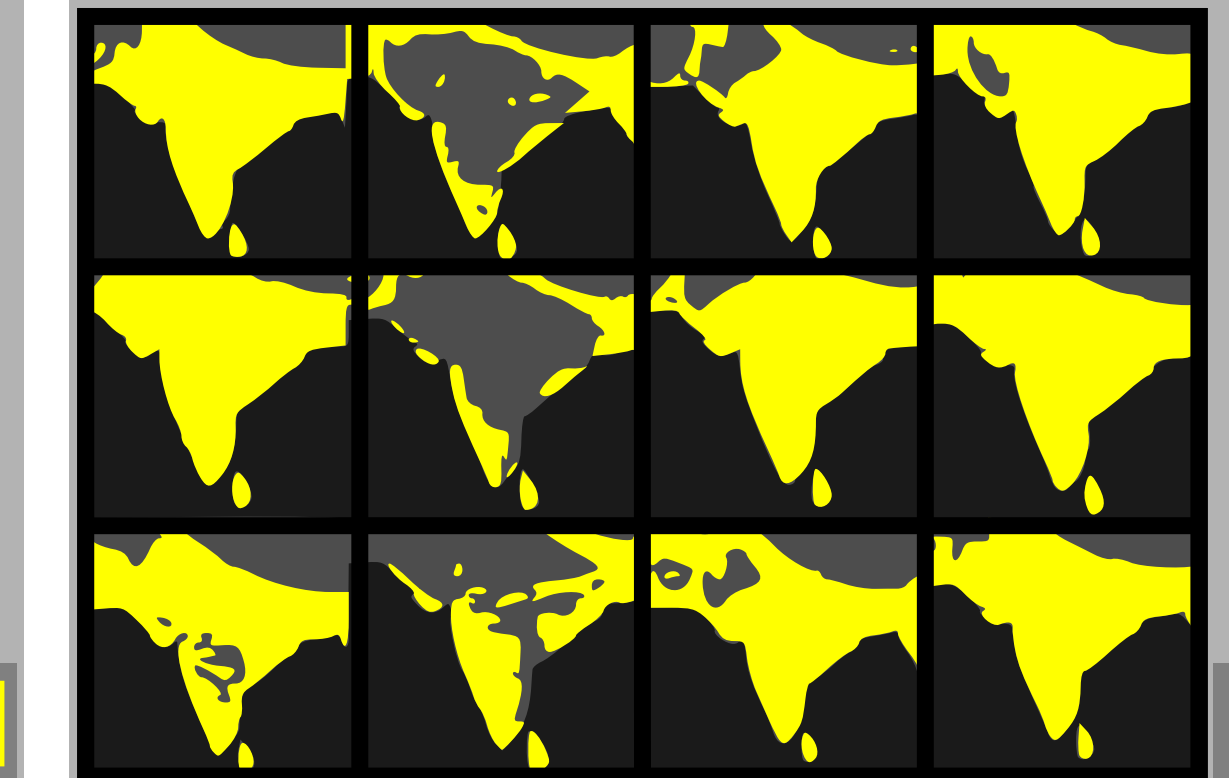

(c)

T

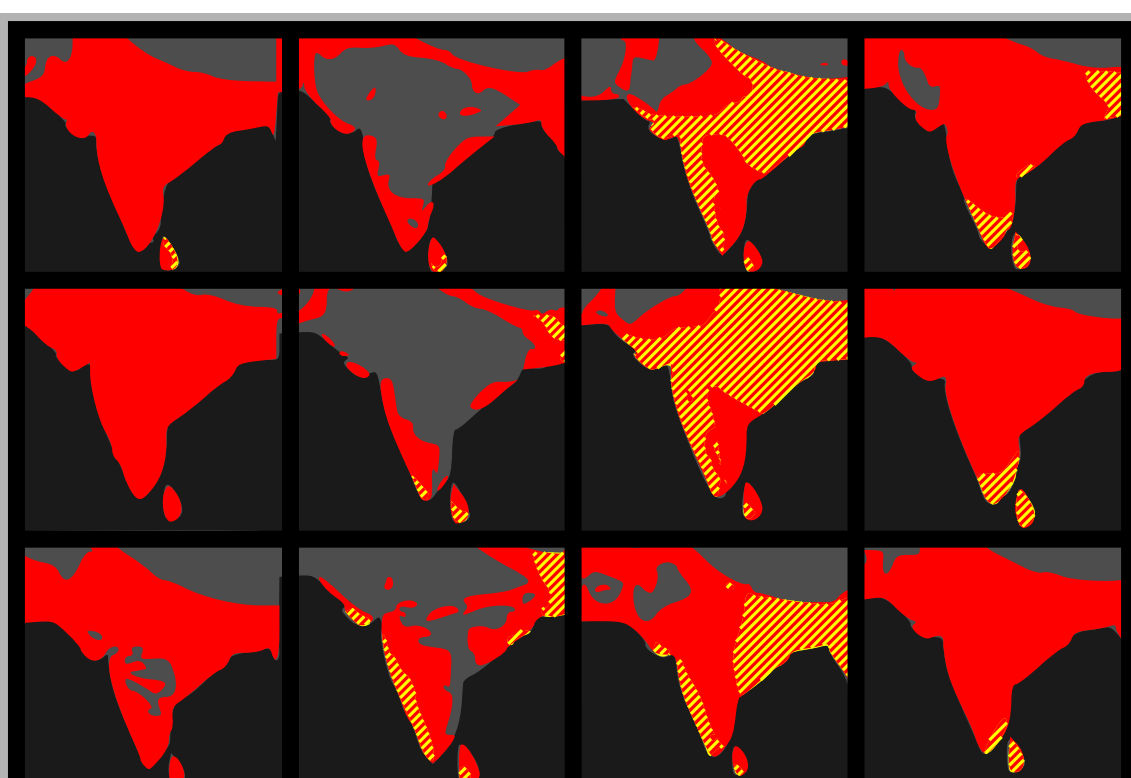

(e)

P  
RH  
T

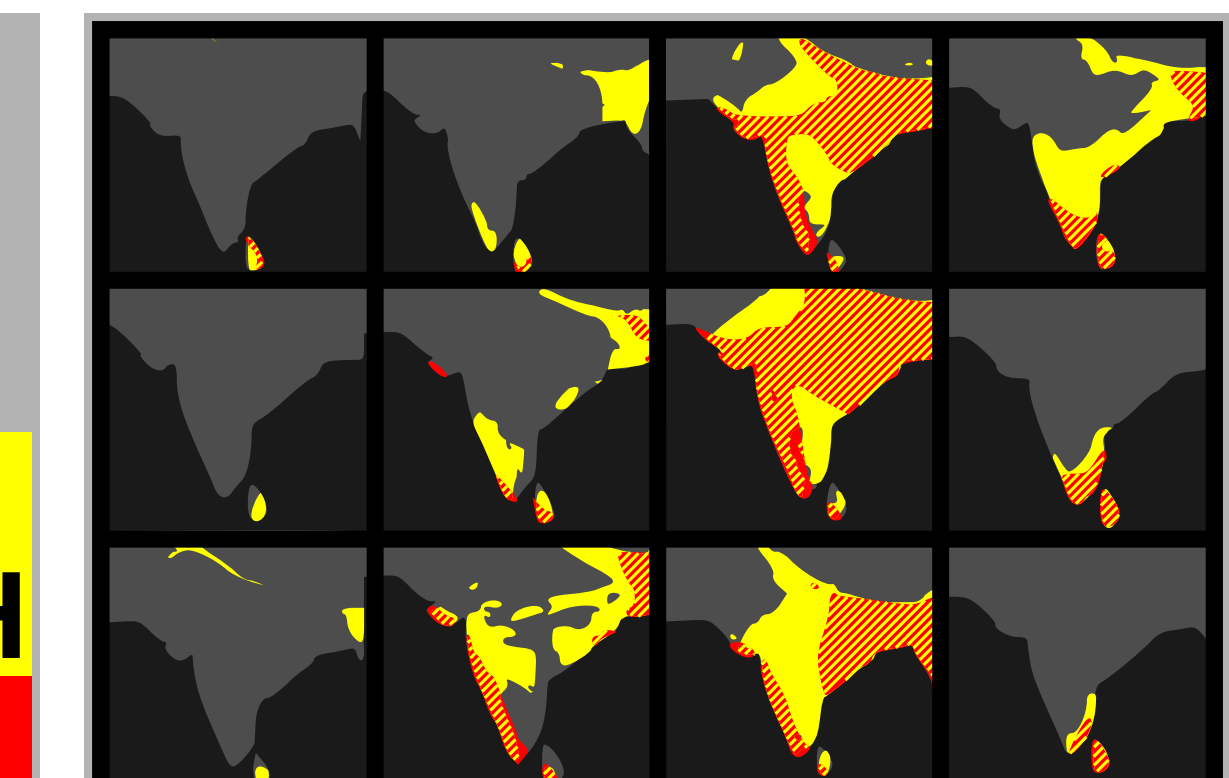

(f)

P  
RH  
T

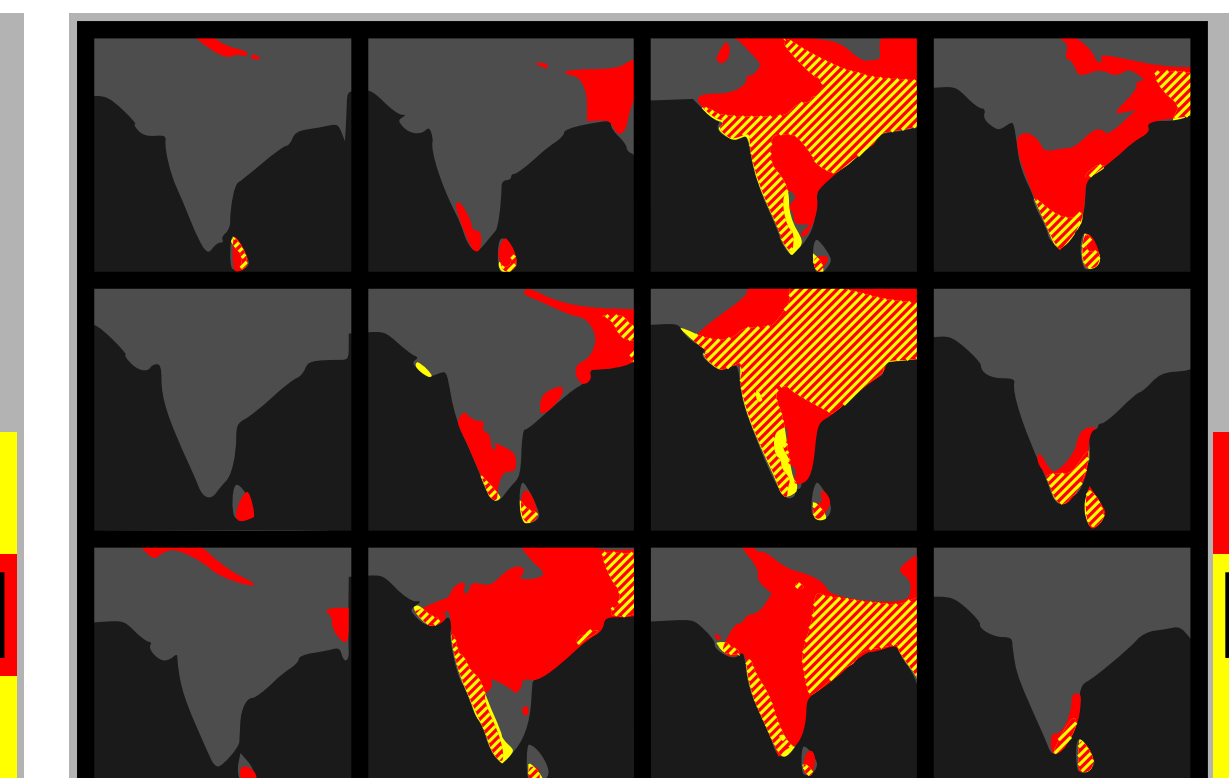

(g)

P  
RH  
T

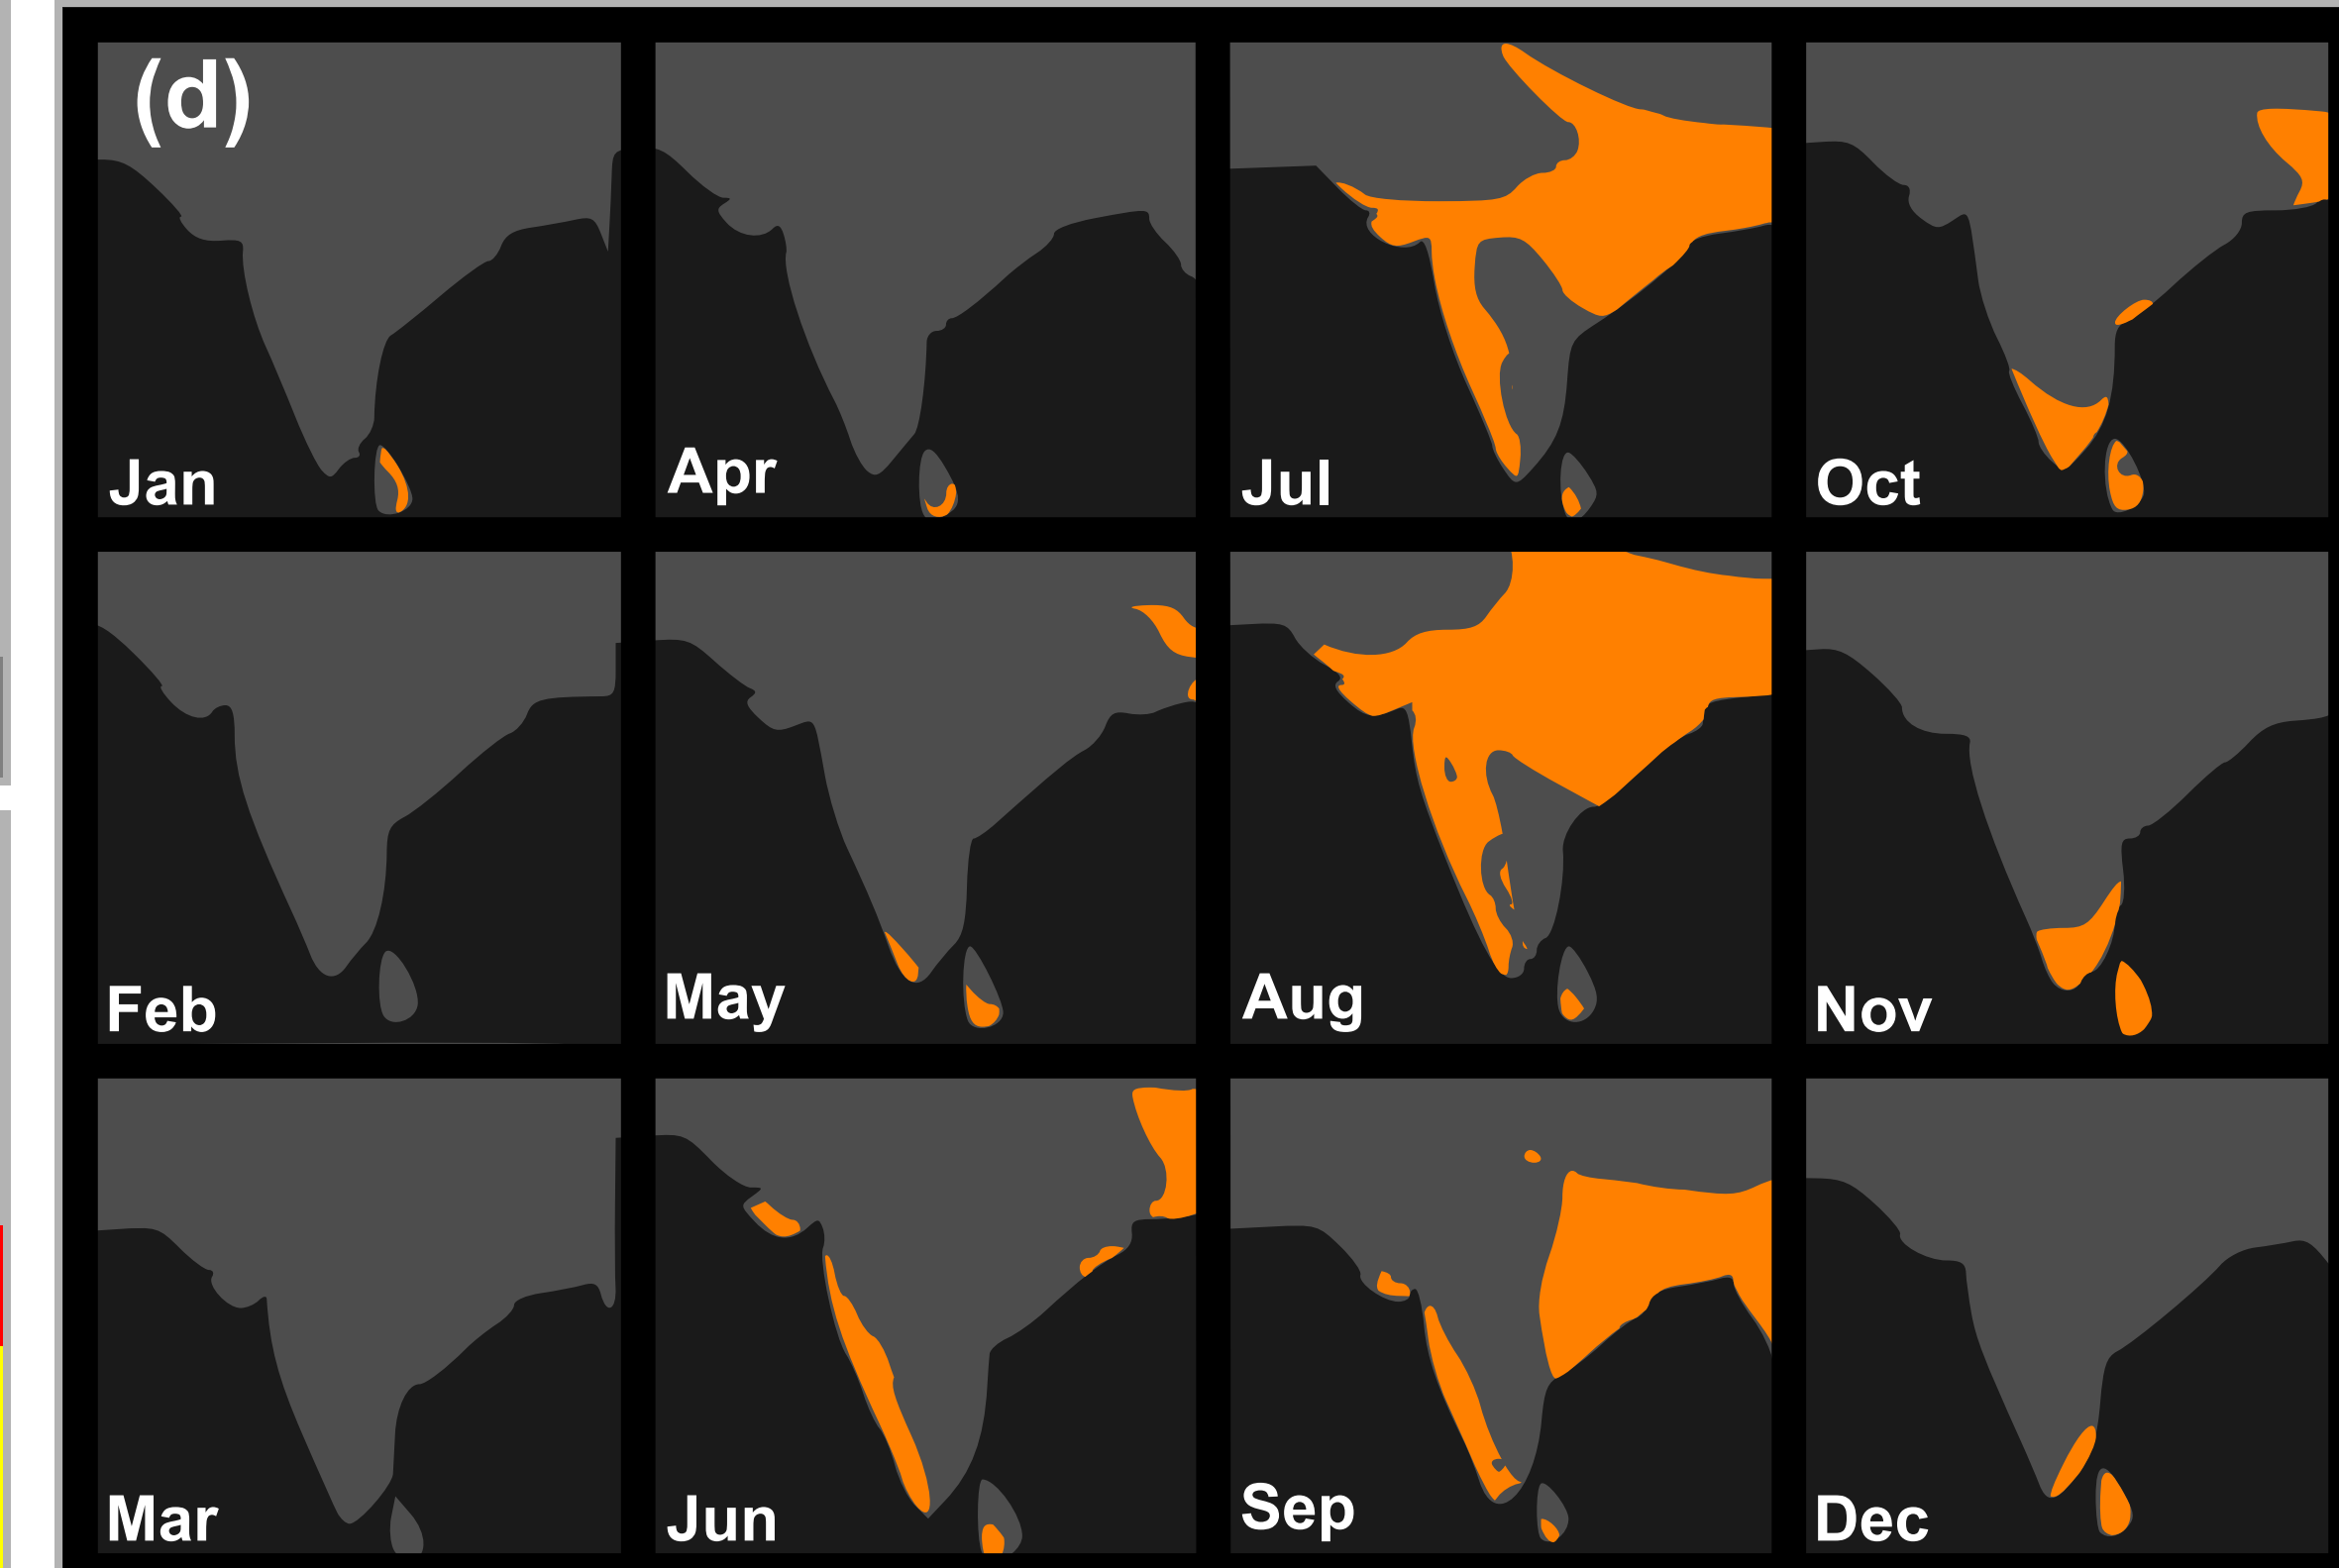

Supplement: s1 [file s1]
